# Supplementary material
Source: PubMed Central journal article supplement (PMC4332813)

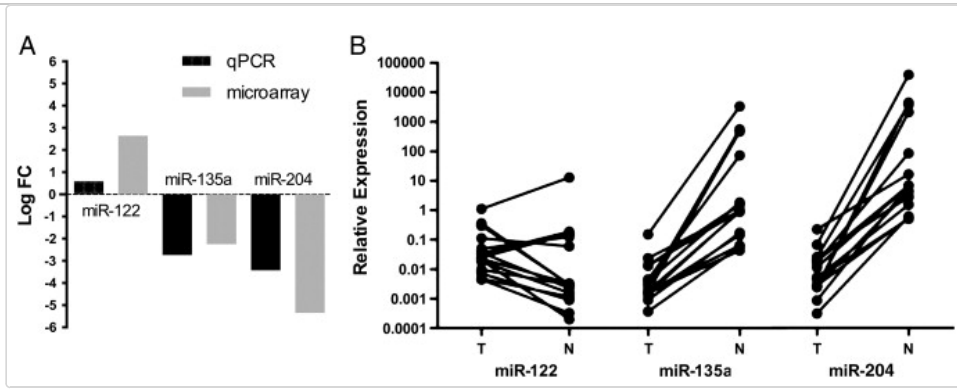

Supplement: NIHMS662126-supplement-Fig_31.pdf [file NIHMS662126-supplement-Fig_31.pdf]
